*Hentschke et al. 2021*

1 **Establishment of the family Zarkiaceae (Oscillatoriales, Cyanobacteria) and**  
2 **description of the new marine genera *Zarkia* (Zarkiaceae, Oscillatoriales) and**  
3 ***Romeriopsis* (Leptolyngbyaceae, Synechococcales), from northern Portugal**

4

5 Guilherme S. Hentschke<sup>a</sup>, Ângela Pinheiro<sup>a</sup>, Vitor Ramos<sup>a,b</sup>, Aldo Barreiro<sup>a</sup>, M. Sofia  
6 Costa<sup>a</sup>, Sébastien Brule<sup>a</sup>, Vitor M. Vasconcelos<sup>a,c</sup>, Pedro N. Leão<sup>a\*</sup>

7

8 <sup>a</sup> *Interdisciplinary Centre of Marine and Environmental Research (CIIMAR/CIMAR),*  
9 *University of Porto, Av. General Norton de Matos, 4450-208, Matosinhos, Portugal*

10 <sup>b</sup> *Centro de Investigação de Montanha (CIMO), Instituto Politécnico de Bragança,*  
11 *Campus de Santa Apolónia, 5300-253 Bragança, Portugal*

12 <sup>c</sup> *Faculty of Sciences, University of Porto, Rua do Campo Alegre, 4169-007 Porto,*  
13 *Portugal*

14

15 \*Corresponding author

16 Email address: [pleao@ciimar.up.pt](mailto:pleao@ciimar.up.pt) (Pedro N. Leão)

17

18

19 **ABSTRACT**

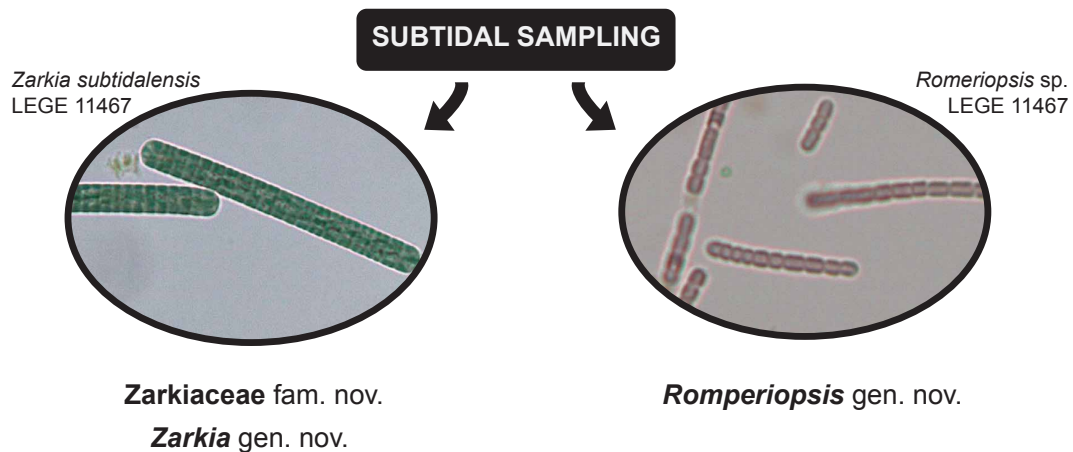

22 The morphology, 16S rRNA gene phylogeny and the 16S-23S rRNA gene ITS  
23 secondary structures of three strains of marine Cyanobacteria, isolated from inter- and  
24 subtidal environments from north Portugal were studied, resulting in the description of  
25 *Zarkia subtidalensis* gen. et. sp. nov. (Zarkiaceae fam. nov.) and *Romeriopsis marina*  
26 gen. et. sp. nov (Leptolyngbyaceae). No diacritical morphological characters were found  
27 either for the new family or for the new genera. The 16S rRNA gene Maximum  
28 Likelihood and Bayesian phylogenies supported that *Zarkia* and Zarkiaceae are  
29 members of the Oscillatoriales, positioned close to Microcoleaceae genera, but distant  
30 from *Microcoleus*. *Romeriopsis* is positioned within the Leptolyngbyaceae and is  
31 closely related to *Alkalinema*. The secondary structures of the D1-D1', Box B, V2 and  
32 V3 helices corroborate with the phylogenetic results. Furthermore, our study supports  
33 previous observations of polyphyletic Oscillatoriales families and reinforces the need  
34 for their taxonomical revision.

35  
36 **Keywords:** subtidal, intertidal, phylogeny, taxonomy.

37

38

## 39 **1. Introduction**

40

41 Cyanobacteria are important primary producers in the world's oceans and shape  
42 both planktonic and benthic marine communities (Hamilton et al., 2016). In addition,  
43 they produce a plethora of secondary metabolites, such as alkaloids, polyketides, and  
44 peptides with a great variety of biological activities with some being currently used to  
45 treat cancer in the clinic (Leão et al., 2012; Calteau et al., 2014). Despite their global  
46 and biotechnological importance, the diversity of marine Cyanobacteria is still  
47 underestimated, and recently, many new genera of Cyanobacteria have been described,  
48 such as *Leptothoe* Konstantinou et Gkelis, *Marileptolyngbya* Zhou et Ling,  
49 *Salileptolyngbya* Zhou, *Lusitaniella* Ramos et al., *Dapis* Engene et al., *Capillus* and  
50 *Neolyngbya*, for example (Brito et al., 2017; Caires et al., 2018a; 2018b; Engene et al.,  
51 2018; Zhou et al., 2018; Konstantinou et al., 2019).

52 The growing number of new taxa descriptions, the availability of 16S rRNA  
53 gene sequences for the respective type species, and the access to computational tools  
54 that allow to expeditiously perform extensive phylogenetic reconstructions (Miller et  
55 al., 2015), has brought to light that many cyanobacterial families from the classical,  
56 morphological-based taxonomy are polyphyletic, warranting taxonomical revisions  
57 (Jahodarová et al., 2017; Nowicka-Krawczyk et al., 2018; Mai et al., 2018). Up to now,  
58 the only revision at the order level for Cyanobacteria, on the basis of robust  
59 phylogenetic analysis and morphological descriptions, concerned the  
60 Synechococcales and was carried out by Mai et al. (2018). In that paper, the authors  
61 describe two new families and six new genera containing 14 species. The authors  
62 consider five families in the order, one of which (Trichocoleaceae) comprising a single  
63 genus. The description of families with a single genus based on a single-gene

*Hentschke et al. 2021*

64 phylogenetic analysis is not a novelty (Hentschke et al., 2016) and is necessary for  
65 monophyletic clades (Johansen and Casamatta, 2005), which are well supported and not  
66 clustered in any already known family.

67         Against this backdrop, in this paper we describe the new family Zarkiaceae to  
68 hold the new cyanobacterial genus *Zarkia*, and also describe the new genus *Romeriopsis*  
69 (*Leptolyngbyaceae*), from intertidal and subtidal environments sampled in north  
70 Portugal.

71

72

## 73 **2. Materials and Methods**

### 74 *2.1. Sampling and sites*

75         Two samples were obtained in the subtidal zone seafloor, at 13 m depth, by  
76 collection of rocky substrate surfaces using 50 mL sterile polypropylene syringes, by  
77 SCUBA diving at 'A Pedra', a diving spot in front of the São Francisco Xavier fort,  
78 ~200 m off the coast, in the city of Porto, Portugal (41.185809 N 8.719079 W). The  
79 samples were kept in 50 mL polypropylene tubes until being processed in the laboratory  
80 at CIIMAR, Porto, Portugal. These samples led to the isolation of strains *Zarkia*  
81 *subtidalensis* LEGE 11467 and *Romeriopsis* sp. LEGE 11480, while strain *Romeriopsis*  
82 *marina* LEGE 06013 had been previously isolated from a wave-exposed rock, Praia da  
83 Foz do Arelho, Caldas da Rainha (39.43327 N 9.230275 W), Portugal, as reported in  
84 Brito et al. (2012) and was obtained from the LEGE Culture Collection (LEGE-CC) at  
85 CIIMAR, Porto, Portugal (<http://lege.ciimar.up.pt>) (Ramos et al., 2017). The north  
86 Portuguese coastal environments, a temperate climate region, where the studied strains  
87 were collected are vulnerable to wave action, being under a strong tide and wave regime  
88 especially in the winter (Coelho et al., 2009).

Hentschke et al. 2021

89

## 90 2.2. Isolation strategy

91 After arrival at the laboratory, subtidal samples were observed under a light  
92 microscope. The environmental samples were not clearly dominated by cyanobacteria  
93 and therefore they were inoculated in liquid medium, supplemented with 25 g L<sup>-1</sup> sea  
94 salts (Tropic Marine) and 10 µg ml<sup>-1</sup> vitamin B<sub>12</sub>. The enrichment cultures were kept  
95 under low light conditions <10 µmol m<sup>-2</sup> s<sup>-1</sup> under a 14 hour light/ 10 hour dark regimen  
96 and at 19 °C. As soon as consistent growth of cyanobacteria was detected, aliquots were  
97 transferred onto solid Z8 medium plates with 1.5% agarose, supplemented with sea salts  
98 and vitamin B<sub>12</sub> as described above. Liquid and solid cultures were grown at 25 °C,  
99 under a 14 hour light (approximately 30 – 40 µmol m<sup>-2</sup> s<sup>-1</sup>)/ 10 hour dark regimen.

100 When single colonies or filaments were detected, these were picked with an inoculating  
101 loop and streaked onto a new medium plate. The streak plate technique was repeated  
102 until unicyanobacterial cultures were obtained following inoculation in liquid medium.  
103 The resulting unicyanobacterial strains have been deposited and since been kept in  
104 LEGE-CC under controlled temperature between 19°C and 21°C, photoperiod 14h  
105 light/10h dark, and light intensity 15–25 µmol photons m<sup>-2</sup> s<sup>-1</sup>.

106

## 107 2.3. Morphological analysis

108 The morphological plasticity and cell measurements (n = 50 cells) of 50  
109 individuals of *Zarkia* (LEGE 11467) and *Romeriopsis* strains (LEGE 06013, LEGE  
110 11480) were examined using a Leica DMLB light microscope (Wetzlar, Germany) and  
111 micrographs were acquired with an Olympus DP73 camera and the Leica Application  
112 Suite V.4 software. The morphological characterization was made according to  
113 Komárek and Anagnostidis (2005), observing the following characters: 1) macroscopic

*Hentschke et al. 2021*

114 aspect of the culture; 2) number of cells in trichomes; 3) trichome curvature and  
115 constriction; 4) shape of cells and measurements; 5) cell content; 6) presence/absence of  
116 aerotopes; 7) presence/absence of filaments sheaths or mucilage (using China Ink); 8)  
117 reproduction. The measurements were tabulated and the cells length/width were  
118 calculated for each of the new genera.

119

#### 120 *2.4. DNA extraction, PCR amplification and sequencing*

121 Total genomic DNA of the three studied strains (LEGE 06013, LEGE 11480 and  
122 LEGE 11467) was isolated using MOBIO Ultraclean DNA Isolation Kit (Life  
123 Technologies). To obtain the 16S rRNA gene and the 16S-23S Internal Transcribed  
124 Spacer (ITS) of the strains LEGE 06013 and LEGE 11467, the PCR was performed  
125 using the primers 27F1 (Neilan et al., 1997) and 23SR (Taton et al., 2003) in a Biometra  
126 2 thermal cycler (Analytik Jena). The reaction contained 13 µl H<sub>2</sub>O, 5 µl 5× Buffer  
127 (Promega), 2 µl MgCl<sub>2</sub> (25mM), 1 µl DNTPs (10 µM), 1.25 µl of each primer (10 µM),  
128 0.3 µl of GoTaq polymerase (Promega). The thermal cycling conditions used were:  
129 initial denaturing 94°C (5 min) followed by 10 cycles of 94 °C (45 s), 57 °C (45 s), 72  
130 °C (2 min), then 25 cycles of 92 °C (45 s), 54°C (45 s), 72°C (2 min) before a final  
131 elongation step of 72°C (7min). The PCR products were cloned using the pGEM®-T  
132 Easy Vector System (Promega, Madison, WI, USA), transformed by heat-shock into *E.*  
133 *coli* cells and plated for blue-white screening (Sambrook & Russel 2001). Two colonies  
134 were selected for each strain. After growth, plasmids were extracted from white  
135 colonies using the NZYTech Miniprep Kit (NZYTech), and were prepared for  
136 sequencing using the primers 27F (Neilan et al., 1997), 359F (Nubel et al., 1997), 781R  
137 (Nubel et al., 1997), 1114F (Lane, 1991) and 23S30R (Neilan et al., 1997). The  
138 resulting sequences were assembled using Geneious 8.1.9. software package

*Hentschke et al. 2021*

139 (Biomatters) and analyzed for the presence of chimeras hidden in the rRNA sequences  
140 by DECIPHER web tool (Wright et al., 2012).

141 To obtain the sequence of the 16S rRNA gene of strain LEGE 11480, this gene  
142 was amplified from its gDNA using two set of primers: 27F/781R and 359F/1494R  
143 (Neilan et. al, 1997; Nubel et al., 1997) in a MyCycler (Bio-Rad laboratories Inc.,  
144 Hercules, CA, USA) or T-Professional Standard (Analytik Jena) thermal cyclers,  
145 following the methodology previously described (Tamagnini et al., 1997). For this set of  
146 primers, the PCR reaction contained 7.9 µl H<sub>2</sub>O, 4 µl 5× Buffer (Promega), 2 µl MgCl<sub>2</sub>  
147 (25mM), 1 µl DNTPs (10 µM), 2 µl of each primer (10 µM), 0.1 µl GoTaq polymerase  
148 (Promega) and 1 µl of template DNA. The thermal cycling conditions were: initial  
149 denaturation at 95 °C for 2 min, followed by 35 cycles of denaturation at 95 °C for 1  
150 min, annealing at 55 °C for 45 s, and extension at 72 °C for 1 min, and a final extension  
151 step at 72 °C for 5 min. After PCR, to obtain the sequences, the PCR products were  
152 purified using NucleoSpin® Gel and PCR Clean-up kit (Macherey-Nagel, Düren,  
153 Germany). Purified PCR products were cloned into pGEM®-T Easy Vector (Promega,  
154 Madison, WI, USA), and transformed into OneShot TOP10 chemically competent  
155 *Escherichia coli* cells (Invitrogen, Carlsbad, CA) by heat-shock. After blue-white  
156 screening, plasmid DNA was isolated using GenElute™ Plasmid Miniprep Kit (Sigma-  
157 Aldrich) and sequenced using the M13 primers: reverse (22mer): 5'-d  
158 (TCACACAGGAAACAGCTATGAC)-3' and forward (24mer): 5'-d  
159 (CGCCAGGGTTTTCCCAGTCACGAC)-3'. The resulting sequences were assembled  
160 using Geneious 7.0. software package (Biomatters) and analyzed for the presence of  
161 chimeras hidden in the rRNA sequences by DECIPHER web tool (Wright et al., 2012).

162

*Hentschke et al. 2021*

163 *2.5. 16S rRNA gene phylogenetic analysis and 16S-23S rRNA intergenic spacer (ITS)*

164 *secondary structures*

165 Phylogenies were constructed aligning *Zarkia* and *Romeriopsis* 16S rRNA gene  
166 sequences with a set of 85 sequences of homocytous cyanobacterial strains retrieved  
167 from the GenBank using BLAST. Also, we added reference strains of Synechococcales  
168 and Oscillatoriales genera and families. The total alignment length had 2384 nucleotide  
169 positions with 936 informative sites. Then, to find the phylogenetic positions of our  
170 sequences, we performed Maximum Likelihood (ML) and Bayesian Inference (BA)  
171 analysis. A similarity matrix (p-distance) was also generated to compare taxa, using  
172 MEGA version 6 (Tamura et al., 2013).

173 All the alignments were performed using ClustalW (Thompson et al., 1994); ML  
174 trees were performed using RAxML-HPC2 on XSEDE 8.2.10 (Stamatakis, 2014) with  
175 bootstrap = 1000; BA tree was performed using MrBayes on XSEDE 3.2.6 (Ronquist et  
176 al., 2012), with two runs of  $5 \times 10^7$  generations and NST = 6. The other parameters were  
177 left as defaults. The standard deviation for split frequencies was 0.01. All of those were  
178 ran on CIPRES Science Gateway (Miller et al., 2015).

179 The secondary structures of the D1-D1', Box B, V2 and V3 helices of 16S-23S  
180 rRNA ITS were folded using Mfold (Zuker, 2003) using default parameters. The V2  
181 helices were not found in *Pantanalinema* Vaz et al. sequences, because these ITS  
182 sequences do not present tRNAs.

183

184

### 185 **3. RESULTS**

186 *3.1. Phylogenetic analysis*

187



Hentschke et al. 2021

188           The BA (Fig. 1) and ML (Fig. S1) phylogenies (91 OTUs, 936 informative sites)  
189   show very identical topologies and strong statistical support in the backbones. Both  
190   trees show Oscillatoriales (BA 0.99, ML 78) and Synechococcales (BA 1, ML 37) as  
191   monophyletic orders, although Pseudanabaenaceae (traditionally Synechococcales) is  
192   positioned at the base of both trees, outside of Oscillatoriales or Synechococcales.

193           The phylogenies confirm *Romeriopsis* as a monophyletic clade (ML=100,  
194   BA=1) in family Leptolyngbyaceae (Synechococcales), being closely related to  
195   *Alkalinema*. The new genus *Zarkia* is also monophyletic, with strong phylogenetic  
196   support (ML=100, BA=1), and is clustered with *Lyngbya cf. confervoides* (ML=79,  
197   BA=0.8), “*Phormidium*” GI08AO and *Oxynema* clades in the Oscillatoriales. In these  
198   phylogenetic trees, the order Synechococcales presents well-supported monophyletic  
199   families. The order Oscillatoriales presents polyphyletic families, such as  
200   Microcoleaceae and Oscillatoriaceae.

201           Although *Zarkia* is clustered with the Microcoleaceae genus *Oxynema* (ML=72,  
202   BA=1), the new genus is phylogenetically distant to *Microcoleus* and cannot be  
203   included in Microcoleaceae. Furthermore, *Zarkia* is not clustered with any other  
204   reference strain of any already known family (e. g. *Oscillatoria princeps* CCALA 115  
205   for Oscillatoriaceae). These observations, taken together with the polyphyletic  
206   Oscillatoriales families, preclude the inclusion of the new genus *Zarkia* in any  
207   previously described family. Consequently, we describe below the new monophyletic  
208   family Zarkiaceae to encompass *Zarkia*, *Oxynema* Chatchawan and related clades.

209           The similarity matrix (p-distance) (Table S1) corroborates the phylogenetic  
210   inferences and confirms *Romeriopsis* and *Zarkia* as new genera. This analysis shows  
211   *Romeriopsis* with 98.4-99.7% of intra-clade similarity and only 89.6% of similarity to  
212   *Alkalinema*, its phylogenetically most closely-related clade. The similarity between

Hentschke et al. 2021

213 *Zarkia* sequences is 99.1% and the similarity between this clade and *Lyngbya*  
 214 *confervoides*, its most closely-related clade, is only 86.3%. The similarity between  
 215 *Zarkia* and the clade of *Phormidium* GI08AO and *Geitlerinema* sp. PCC 7105 ranges  
 216 between 93.6-94.5%.

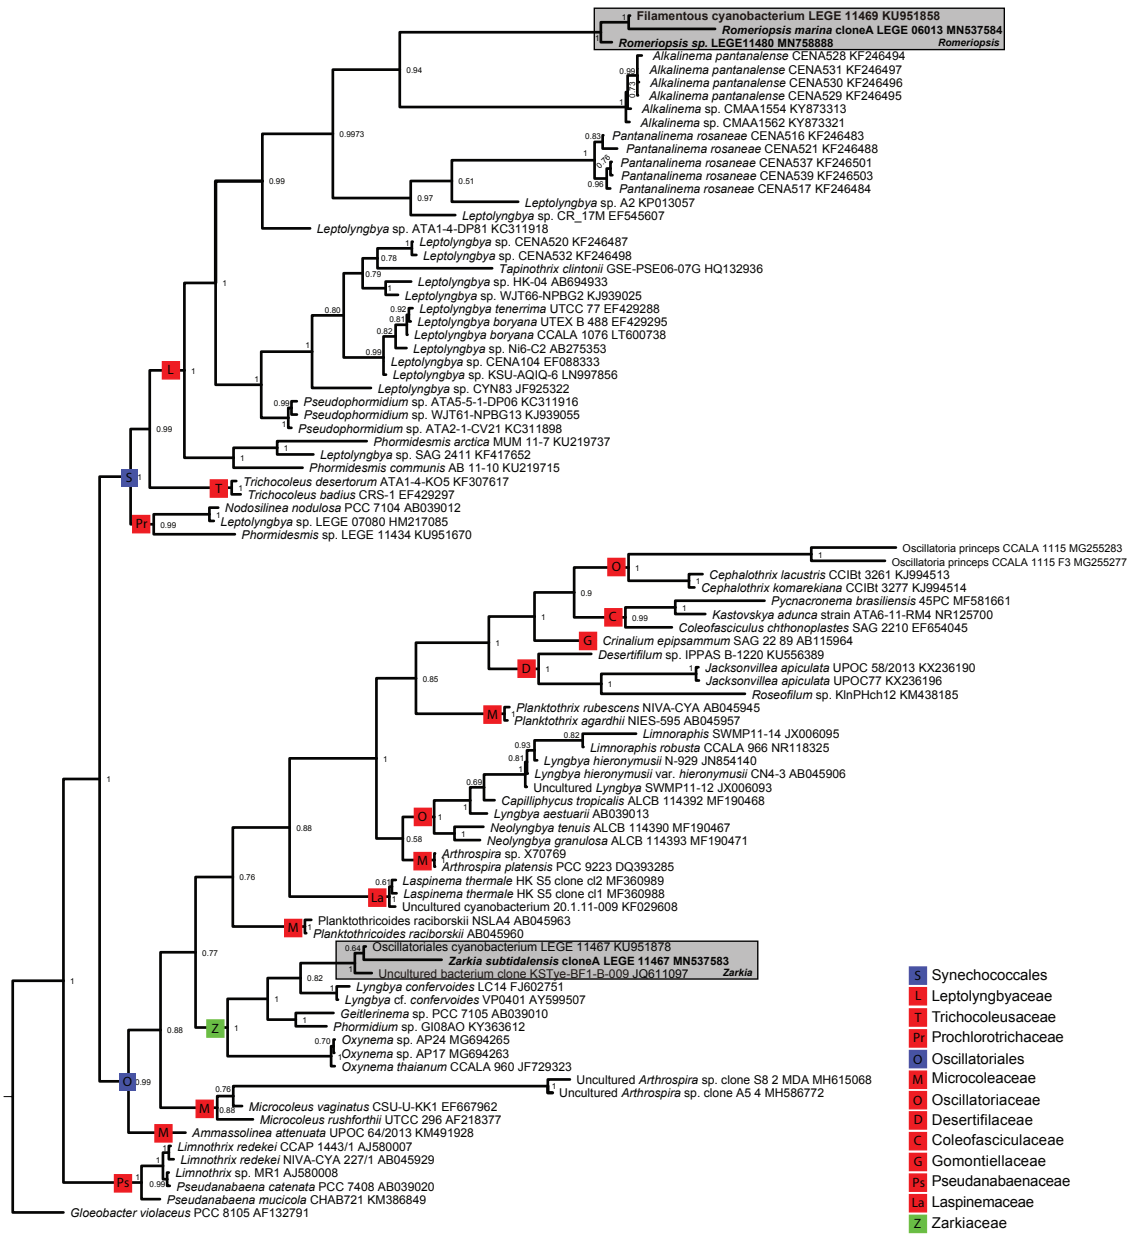

217

218 **Fig. 1.** Bayesian 16S rRNA gene phylogeny constructed with trees 91 OTUs and 936 informative  
 219 sites. Nodes support are presenting BA posterior probabilities. The strains sequenced for this study  
 220 are in bold. Blue squares represent order level nodes. Red squares represent family level nodes.

221

222

Hentschke et al. 2021

223 3.2. 16S-23S rRNA intergenic spacer (ITS) analysis

224 3.2.1. *Zarkia*

225 We compared the ITS secondary structure of *Zarkia* with that of its  
226 phylogenetically closest related described genus with available ITS data, *Oxynema* (Fig.  
227 2). It was possible to compare only the D1-D1' helix, because of the short length of the  
228 *Oxynema* CCALA 960 JF729323 sequence. Between both genera, this helix is variable  
229 in sequence, length and structure. *Zarkia* D1-D1' helix presents a long basal stem with  
230 10 bp plus two residues, while *Oxynema* presents the typical 4 bp (5'GACC3' /5'GGTC3')  
231 D1-D1' cyanobacterial basal stem. The long basal stem of *Zarkia* is unique among  
232 Cyanobacteria. Furthermore, the 5' side of *Zarkia*'s molecule presents no residues  
233 opposing the first lateral bulge, while *Oxynema* presents three residues in this position.  
234 These differences support the separation of both genera, which is in line with our  
235 phylogenetic analysis. It was not possible to compare *Zarkia* with *Lyngbya*  
236 *confervoides*, "*Phormidium*" GI08AO and "*Geitlerinema*" PCC7105, because of the  
237 lack of ITS data for these strains.

238

239 3.2.2. *Romeriopsis*

240 We compared the ITS secondary structures of *Romeriopsis* with those of its  
241 phylogenetically closest related genera, *Alkalinema* and *Pantalinema* (Fig. 2).  
242 *Pantalinema*'s ITS sequences do not present the tRNAs, and because of that, the  
243 comparisons among the V2 helices were not possible with this genus. The D1-D1' helix  
244 of *Romeriopsis* and *Alkalinema* are identical in the basal stem, lateral bulge and first  
245 loop, making the differentiation between genera impossible by this helix region. It is  
246 possible to differentiate both genera by the terminal loop. Although *Alkalinema*'s D1-  
247 D1' helices are variable in the genus, the terminal loop is conserved (5'CUAG3') and

Hentschke et al. 2021

248 different from *Romeriopsis* (5'UUCG3'). The Box B, V2 and V3 helices are very  
 249 different in length, sequence and structure, supporting the separation of both genera.  
 250 Comparing *Romeriopsis* with *Pantanalinema*, the D1-D1' helix presents small  
 251 variations among the strains of the latter genus. Even so, these helices are different from

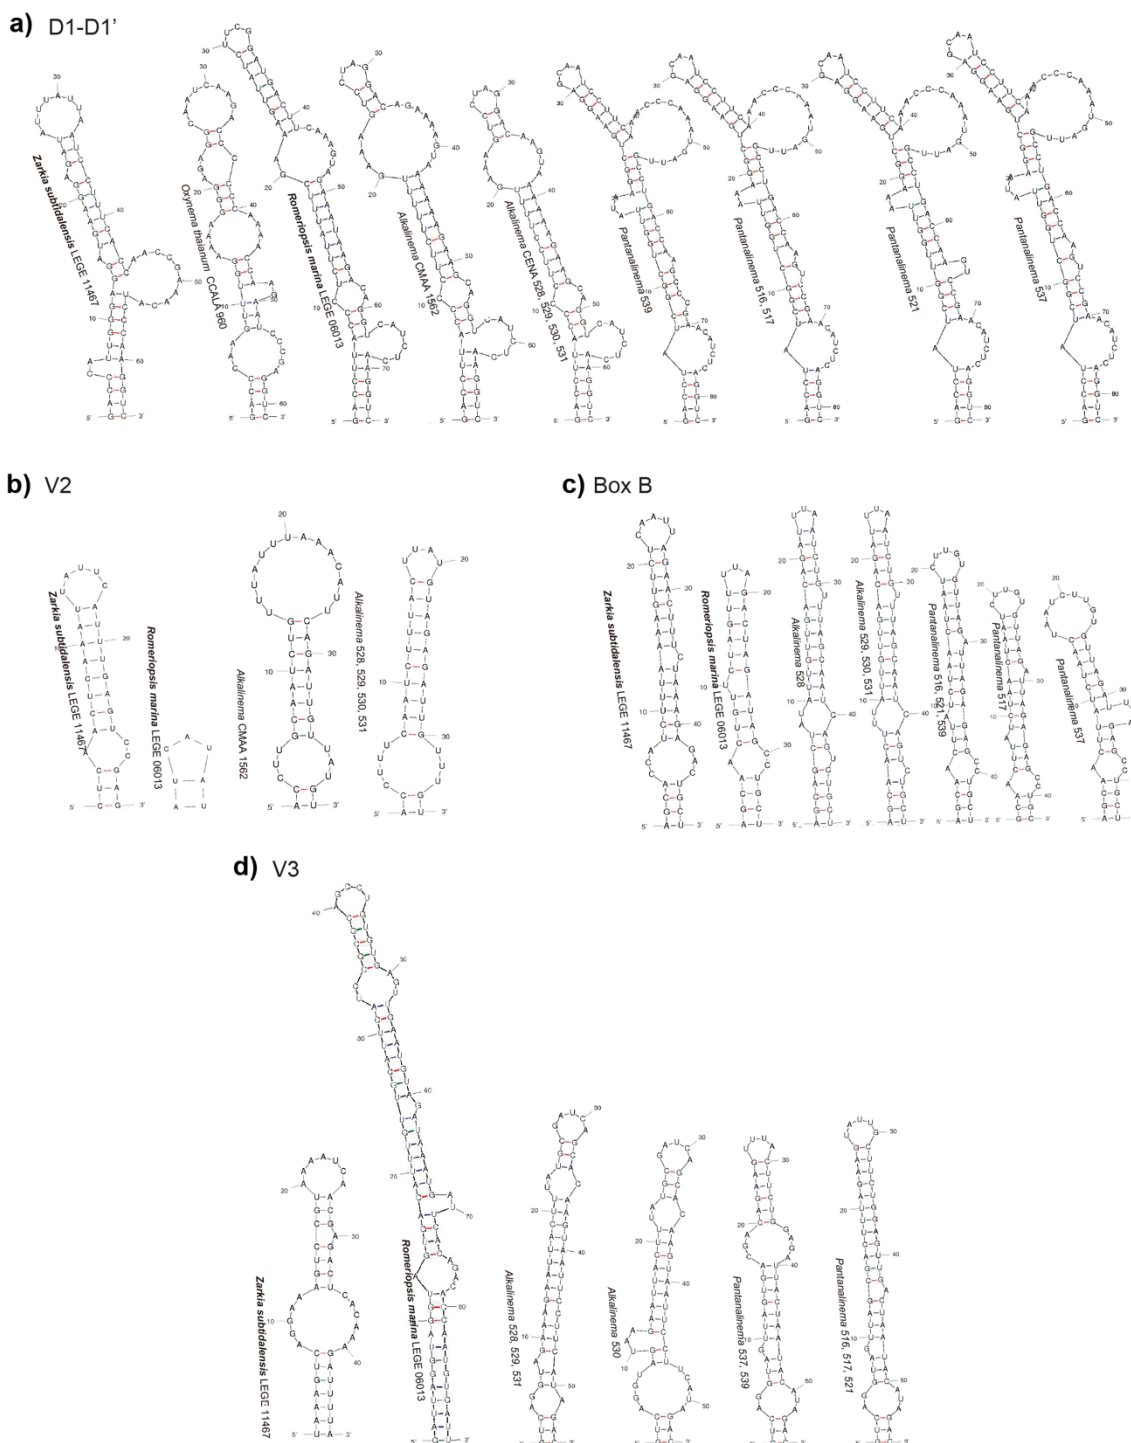

**Fig. 2.** 16S-23S rRNA gene ITS secondary structures of a) D1-D1' helices, b) V2 helices, c) Box B helices and d) V3 helices of *Zarkia*, *Romeriopsis* and phylogenetically related genera.

*Hentschke et al. 2021*

252 *Romeriopsis* helices by length, sequence and structure, remarkably by the presence of an  
253 adenine opposing the first lateral bulge in *Pantanalinema* and absence of residues in this  
254 position in *Romeriopsis*. The Box B, V2 and V3 helices are very different in length,  
255 sequence and structure, also corroborating the separation of both genera.

256

257 *3.3. Descriptions of the new taxa*

258 **Oscillatoriales** Schaffner

259 **Zarkiaceae** fam. nov. G.S. Hentschke & P. N. Leão

260

261 Filaments isopolar, solitary or entangled. Sheaths present, firm or diffluent,  
262 homogenous, opened at the ends, hyaline. Trichomes straight or wavy, cylindrical or  
263 narrowed at the ends, constricted or not constricted at cross-walls, facultatively motile.  
264 Cells isodiametric, longer than wide, shorter than wide, or discoid. Cell content  
265 sometimes granulated, with or without aerotopes. Reproduction by hormogonia.

266

267 Type: *Zarkia subtidalensis* G.S. Hentschke, A. Pinheiro, V. Ramos & P. N. Leão

268

269 ***Zarkia subtidalensis*** gen. et sp. nov. G.S. Hentschke, A. Pinheiro, V. Ramos & P. N.

270 Leão

271 Fig. 3

272

273 In culture, forming mats attached to the flask walls. Filaments isopolar, solitary  
274 or entangled, straight or wavy. Sheaths firm, thin, homogenous and colourless.  
275 Trichomes cylindrical, not constricted or slightly constricted (shorter cells) at cross-  
276 walls, sometimes motile. Cells shorter than wide, rarely isodiametric or, rarely discoid

Hentschke et al. 2021

277 (only after division), 2.7-4  $\mu\text{m}$  length, 5.6-7.6  $\mu\text{m}$  wide, ratio l/w 1.4-2.3 for adult cells.

278 Apical cells rounded. Cell content homogenous, dark green, with aerotopes.

279

280 **Holotype:** PO-T4766 (unialgal population preserved lyophilized), University of Porto  
281 Herbarium.

282 **Type locality:** 'A Pedra', diving spot in front of the fort 'Castelo do Queijo', Portugal:  
283 (41.185809 N 8.719079 W)

284 **Habitat:** marine, subtidal sample, epilithic (13 m depth), about 200 m off the shore.

285 **Etymology:** *Zarkia*, from Arabic-hispanic “zarco” means blue, the color of the ocean,  
286 and for Gonçalves Zarco Square, location of the fort near the collection site;  
287 *subtidalensis* is for subtidal.

288 **Reference strain:** *Zarkia subtidalensis* LEGE 11467 (MN537583)

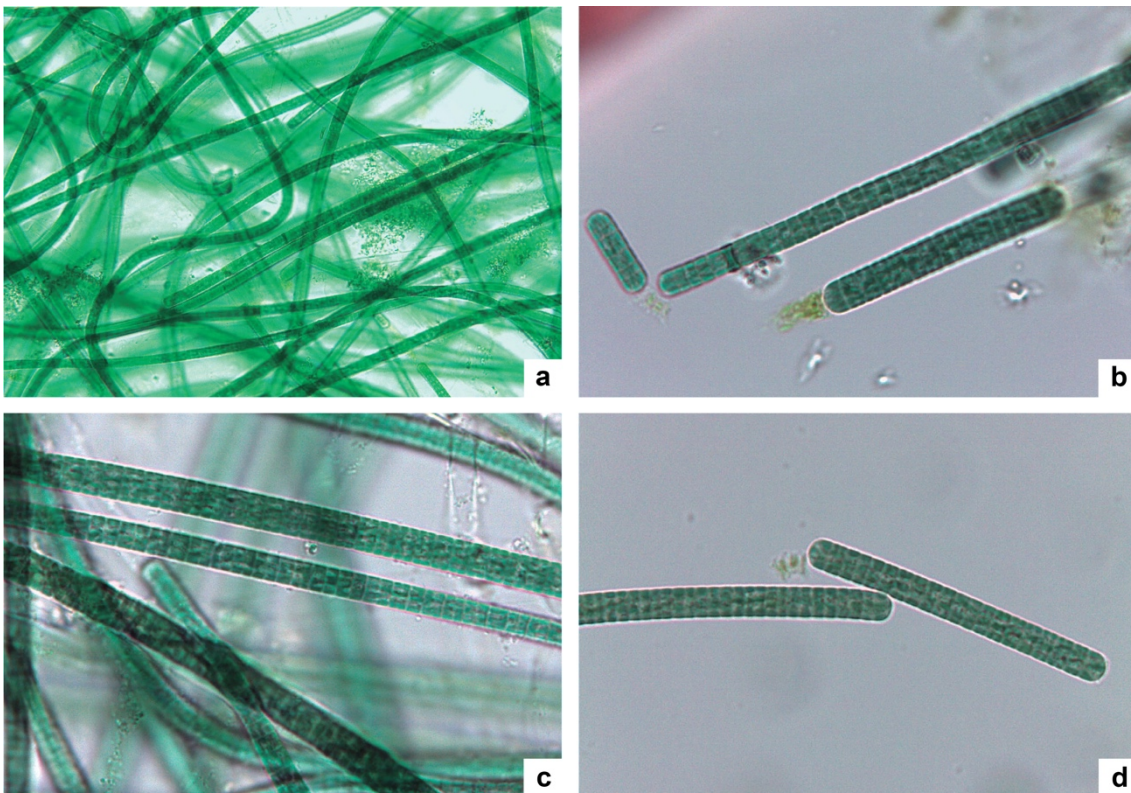

289

290 **Fig. 3.** Microphotographs of *Zarkia subtidalensis*. **a.** General view of the culture; **b-d.** Details of  
291 hormogonia and trichomes showing shorter than wide cells. Magnification: **3a** = 40 $\times$ , **3b-d** = 1000 $\times$ .

292

*Hentschke et al. 2021*

293 Synechococcales Hoffmann et al.

294 **Leptolyngbyaceae** (Komárek et Anagnostidis) Komárek et al. 2014

295 ***Romeriopsis marina*** gen. et sp. nov. G.S. Hentschke, A. Pinheiro, V. Ramos et P. N.

296 Leão

297 Fig. 4a-d

298 In culture, trichomes solitary or forming fluffy clusters not attached to the flask  
299 walls. Trichomes cylindrical, constricted, slightly curved or wavy, few celled (more  
300 common) or long (>50 cells check other species). With very thin sheaths (visible only in  
301 broken filaments) or without. Without mucilaginous envelope. Adult cells longer than  
302 wide, cylindrical or rarely barrel shaped, 1.6-3 µm length, 1.5-2 µm wide, ratio  
303 length/width 1.2-1.9. Terminal cells rounded. Cell content olive-green, not granulated,  
304 without aerotopes. Reproduction by fragmentation of trichomes.

305

306 **Holotype:** PO-T4767 (unialgal population preserved lyophilized), University of Porto  
307 Herbarium.

308 **Type locality:** Praia da Foz do Arelho, Caldas da Rainha, Portugal, (39.43327 N  
309 9.230275 W)

310 **Habitat:** marine, intertidal zone, wave-exposed rock

311 **Etymology:** *Romeriopsis*, similar to *Romeria*, due to the short trichomes; *marina* is for  
312 marine.

313 **Reference strain:** *Romeriopsis marina* LEGE 06013 MN537584

314

315 Notes

316 Differs from *Romeria* by the common presence of long trichomes (>50 cells),  
317 which do not disintegrate easily, by the presence of sheaths and by the absence of

Hentschke et al. 2021

318 diffluent mucilaginous envelopes. Indistinguishable in morphology from

319 *Pantanalinema* and *Alkalinema*.

320 *Romeriopsis* sp. LEGE 11480 (Fig. 4, e-h) was identified only in generic level.

321 This strain is morphologically identical to *Romeriopsis marina* LEGE 06013 but

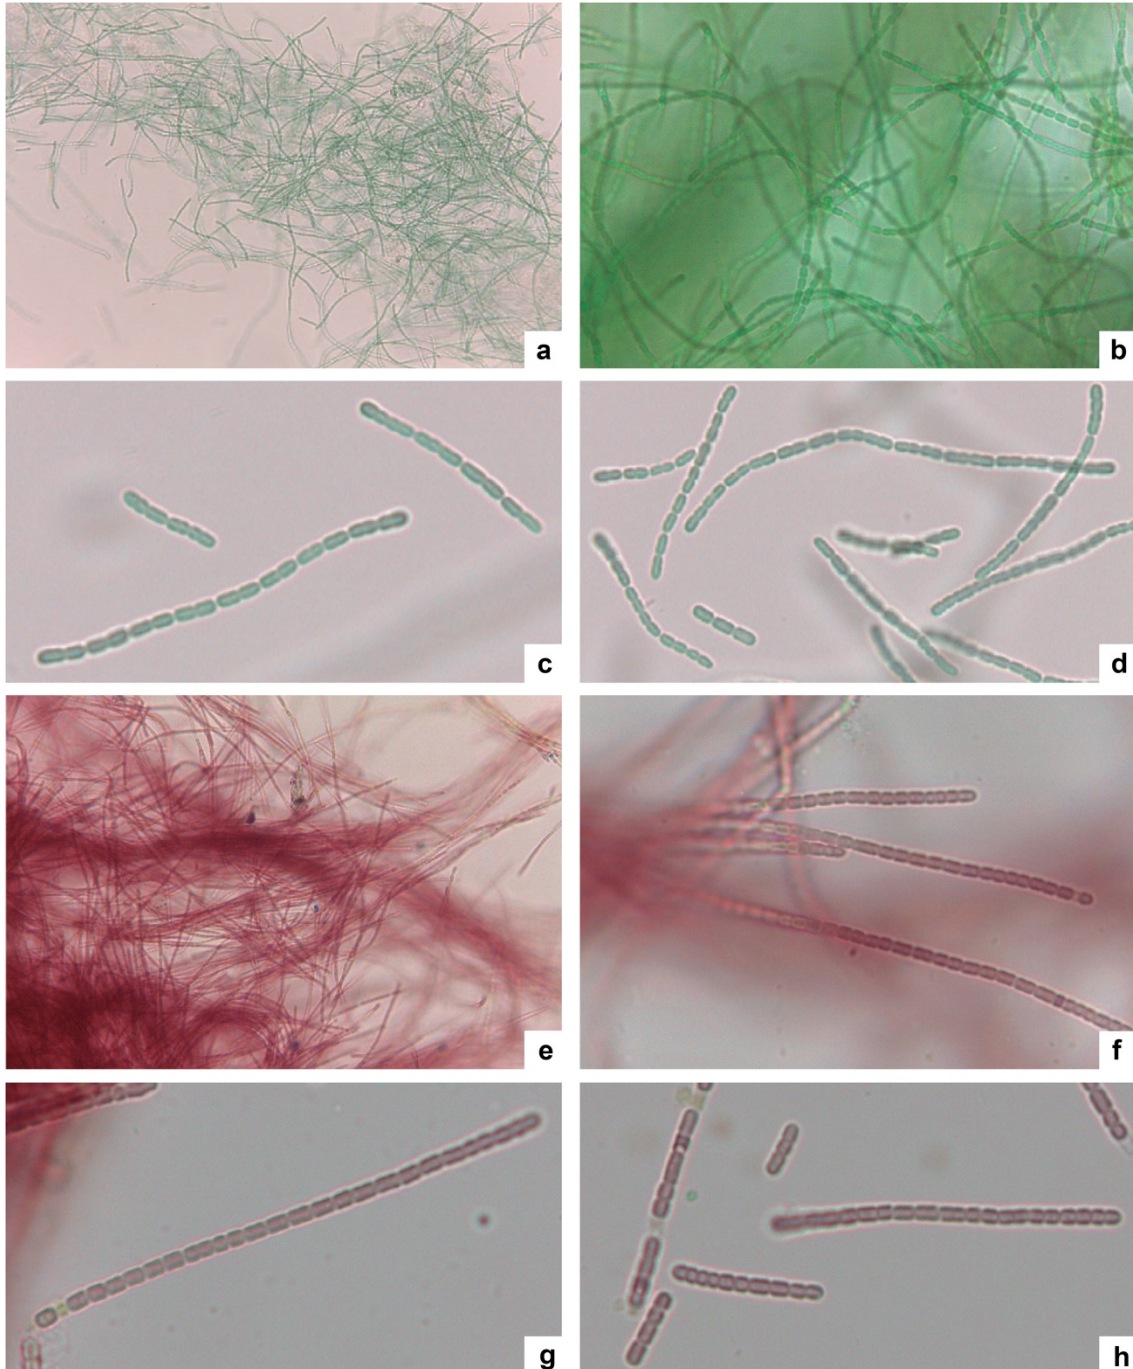

**Fig. 4.** Microphotographs of *Romeriopsis marina* (a-d) and *Romeriopsis* sp. (e-h). a, b – General view of the culture showing long and short trichomes; c, d – Details of short trichomes. e – General view of the culture showing long and short trichomes; f-h – Details of short trichomes. Magnification: 4a, 4e = 40×; 4b-d and 4f-h = 1000×.



*Hentschke et al. 2021*

322 presents reddish cell content and was collected in a different habitat. *Romeriopsis* sp.  
323 LEGE 11480 was collected at the same location and habitat as *Zarkia subtidalensis*  
324 LEGE 11467, on a rocky substrate at 13m depth and 200 m off the shore, being  
325 subtidal, while *R. marina* LEGE 06013 was collected on a wave-exposed rock in the  
326 intertidal zone. Although the 16S rRNA gene tree indicates that *Romeriopsis* sp. LEGE  
327 11480 could be another species in *Romeriopsis* clade, we could not describe it, because  
328 of the lack of ITS data and any morphological diagnostic character.

329

#### 330 **4. Discussion**

331 The wave energy action and related environmental conditions from the north  
332 continental Portuguese coast (Coelho et al., 2009), where the studied marine strains  
333 were collected, are known drivers shaping the coastal biodiversity, including that of  
334 microbial communities (Witt et al., 2012). Along with the sampling effort, this may  
335 partially explain why this marine temperate region is being a rich source of novel  
336 cyanobacteria taxa, already described (Brito et al., 2017) or at least phylogenetically  
337 highlighted (Ramos et al., 2018).

338 In this paper we described the new genera *Romeriopsis* and *Zarkia*, and the new  
339 family Zarkiaceae supported by 16S rRNA gene phylogeny and 16S-23S rRNA ITS  
340 secondary structures. The family Zarkiaceae was named after *Zarkia* and encompasses a  
341 monophyletic clade containing *Zarkia*, as well as the strains *Lyngbya confervoides*  
342 LC14 FJ602751, *Lyngbya* cf. *confervoides* VP0401 AY599507, *Phormidim* sp. GI08AO  
343 KY363612, *Geitlerinema* sp. PCC 7105 AB039010 and the genus *Oxynema*. The strains  
344 identified as *Lyngbya confervoides*, were previously used as reference for *Lyngbya* by  
345 Komárek et al. (2013) and Caires et al. (2018a), but although they are morphologically  
346 and ecologically similar to the type species description, they are not well characterized

Hentschke et al. 2021

347 (Komárek et al., 2013) and cannot be surely assigned to this genus, because of limited  
348 available data (only one photo and not conclusive phylogeny in Sharp et al., 2009).  
349 Many other papers show *Lyngbya* as a polyphyletic genus (Engene et al., 2018; Caires  
350 et al., 2018b; Mühlsteinová et al., 2018) and to identify the true *Lyngbya* clade, a robust  
351 revision of the genus is needed. This has been done, for example, by Mühlsteinová et al.  
352 (2018) to establish the true *Oscillatoria* clade. According to this, we didn't include the  
353 genus *Lyngbya* in Zarkiaceae and chose to consider the *Lyngbya* cf. *confervoides* clade  
354 as still undefined, worthy to be revised., The monophyletic clade containing  
355 “*Phormidium*” GI08AO and “*Geitlerinema*” PCC 7105 strains is another genus that has  
356 to be described in the future.

357 Morphologically, Zarkiaceae is similar to Microcoleaceae, presenting, in the  
358 case of *Zarkia*, isodiametric or slightly shorter than wide adult cells, and is it also  
359 similar to Oscillatoriaceae presenting discoid cells, in the case of *Lyngbya* cf.  
360 *confervoides* strains. As for the descriptions of Ocellatellaceae and Trichocoleaceae  
361 (Synechococcales) (Mai et al., 2018), no diacritical morphological markers were found  
362 for Zarkiaceae. Although this lack of morphological diacritic characters, according to  
363 our trees, we could not assign *Zarkia* to any already described family, considering that  
364 this genus is phylogenetically unrelated to any reference strains for previously-described  
365 families represented here by *Desertifilum* sp. IPPAS B-1220 KU556389  
366 (Desertifilaceae), *Coleofasciculus chthonoplastes* SAG 2210 EF654045  
367 (Coleofasciculaceae), *Crinalium epipsammum* SAG 22.89 NR\_112218  
368 (Gomontiellaceae), *Microcoleus vaginatus* CSU-U-KK1 EF66796 (Microcoleaceae)  
369 and *Oscillatoria princeps* CCALA 1115 F3 MG255277 (Oscillatoriaceae). Furthermore,  
370 it is evident that Oscillatoriales families are polyphyletic. Our trees show six clades  
371 containing Microcoleaceae genera, five of which not related to *Microcoleus*. Likewise,

*Hentschke et al. 2021*

372 there is one additional Oscillatoriaceae clade (*Capilliphycus* and *Neolyngbya* clade) not  
373 related to *Oscillatoria*. Although we find Oscillatoriales as a monophyletic order, our  
374 phylogenies are in agreement with Ishida et al. (2001), Jahodarová et al. (2017) and  
375 Nowicka-Krawczyk et al. (2018), which also show many polyphyletic Oscillatoriales  
376 families, including Microcoleaceae and Oscillatoriaceae. We highlight also that the  
377 family Pseudanabaenaceae (traditionally Synechococcales) is not included in  
378 Oscillatoriales or Synechococcales clades, indicating that the phylogenetic position and  
379 taxonomy of this family must be revised. The same result was found by Mai et al  
380 (2018).

381 In this study we use the monophyletic species concept (Johansen and Casamatta,  
382 2005) for delimitation of genera and families (Komárek et al., 2014; Mai et al., 2018).  
383 As stated by Komárek et al. (2014), “morphological characters used to define higher  
384 taxa...have apparently arisen and/or been lost several times during the evolution of  
385 modern species and genera”. Considering this, we believe that in the near future, after  
386 taxonomical revisions based on 16S rRNA gene, cryptic cyanobacterial families will be  
387 more common. Mai et al. (2018) highlight the importance of finding new markers for  
388 higher taxonomical levels; in order to describe Ocellatellaceae and Trichocoleaceae,  
389 they have used molecular markers in the 16S rRNA gene secondary structures and  
390 *rpoC1* gene phylogenies, which, however were not always in agreement with the 16S  
391 rRNA gene phylogenies. Due to this, we considered the 16S rRNA gene phylogenies as  
392 the current instrument to separate families, which, combined with the monophyletic  
393 nature of Zarkiaceae, led to the description of a new family. The 16S-23S rRNA gene  
394 ITS secondary structures support our proposal, since *Zarkia* presents a unique D1-D1'  
395 helix among Cyanobacteria.

Hentschke et al. 2021

396 In the Synechococcales clade, our phylogenetic analysis (Fig. 1) is in agreement  
397 with the revision of Mai et al. (2018) for the order, showing monophyletic families.  
398 *Romeriopsis* is clearly monophyletic (ML=100, BA=1) and positioned in  
399 Leptolyngbyaceae, clustered with *Alkalinema* and *Pantanalinema*. A smaller related  
400 clade contains strains assigned to *Leptolyngbya* (*Leptolyngbya* sp. A2 KP01305 and  
401 *Leptolyngbya* sp. CR\_17M EF545607), which must be described as a new genus in the  
402 future. The 16S-23S rRNA gene ITS secondary structures are also in agreement with  
403 these findings, as explained in the results section.

404 The herein described new genera, *Zarkia* and *Romeriopsis*, are supported by 16S  
405 rRNA phylogenies, 16S-23S rRNA gene ITS secondary structures and morphological  
406 analysis. *Zarkia* is grouped with high phylogenetic support with *Lyngbya* cf.  
407 *confervoides*, but these taxa are morphologically very different. *Zarkia* presents adult  
408 cells mainly smaller than wide (ratio l/w 1.4-2.3), discoid only after division, while  
409 *Lyngbya* cf. *confervoides* presents the typical *Lyngbya* discoid adult cells. The 16S-23S  
410 rRNA gene ITS secondary structures of the D1-D1' helix of *Zarkia* are unique among  
411 Cyanobacteria, as commented above. *Romeriopsis* is morphologically similar to  
412 *Romeria* regarding a generally short trichome length but differs by the common  
413 presence of long trichomes (>50 cells), which do not disintegrate easily as in *Romeria*,  
414 by the presence of sheaths and the absence of diffluent mucilaginous envelopes. Up to  
415 now, there is no available 16S rRNA gene sequence clearly assigned to *Romeria* in  
416 public databases. For this reason, we have not included this genus in our phylogeny.  
417 *Romeriopsis* is morphologically indistinguishable from *Pantanalinema* and  
418 *Alkalinema*, but the phylogenies and the 16S-23S rRNA gene ITS secondary structures  
419 in the current study confirm that these are three separate genera.

420

*Hentschke et al. 2021*

421

## 422 **5. Conclusion**

423           The 16S rRNA gene is still the most reliable molecular marker for taxonomical  
424 studies at the genus level and is proving to be useful also for family delimitation of  
425 Cyanobacteria, although additional markers must be tested. For that reason, a global  
426 effort from the research community is required to allow the reconstruction of the  
427 evolutionary history of these photosynthetic microorganisms. Traditional,  
428 morphological-based family taxonomy is in conflict with present molecular and  
429 phylogenetic data. By proposing the erection of a new family, this work is an additional  
430 contribution towards the long journey of resolving Cyanobacteria systematics. Based on  
431 the phylogenetic data presented herein, we also emphasize the need for a taxonomic  
432 revision of several Oscillatoriales families and genera.

433

## 434 **Declaration of interest**

435 All authors declare no conflict of interest.

436

## 437 **Statement of informed consent**

438 No conflicts, informed consent, human or animal rights applicable.

439

## 440 **Funding**

441 This work was supported by the European Marine Biological Resource Centre Biobank  
442 -EBB (EAPA\_501/2016) and by Fundação para a Ciência e a Tecnologia (FCT) grants  
443 PTDC/MAR-BIO/2818/2012, UID/Multi/04423/2019 and IF/01358/2014.

444

## 445 **Declaration of the contributions of the authors**

Hentschke et al. 2021

446 GSH worked in collection and assembly of data, analysis and interpretation of the data  
447 and drafting the article. AP, VR, AB, MSC, SB, VV, PNL worked in conception and  
448 design, collection and assembly of data, obtaining of funding, analysis and  
449 interpretation of the data and critical revision of the article for important intellectual  
450 content. All authors read and approved the final version of the manuscript.

451

## 452 **Supporting Information**

453 **Fig. S1.** Maximum Likelihood 16S rRNA gene phylogeny performed with 91 OTUs  
454 and 936 informative sites.

455 **Table S1.** Similarity matrix (p-distance) comparing the 16S rRNA gene of *Zarkia*,  
456 *Romeriopsis* and related strains.

457

458

## 459 **References**

460 Brito, Â., Ramos, V., Mota R., Lima S., Santos, A., Vieira, J., Vieira, C. P., Kaštovsky,  
461 J., Vasconcelos, V. M., Tamagnini, P., 2017. Description of new genera and species of  
462 marine cyanobacteria from the Portuguese Atlantic coast. *Mol. Phyl. Evol.* 111, 18–34.  
463 <https://doi.org/10.1016/j.ympev.2017.03.006>.

464

465 Caires, T. A., Lyra, G. M., Hentschke, G. S., da Silva, A. M. S., de Araújo, V. L.,  
466 Sant'Anna, C. L., Nunes J. M. C., 2018a. Polyphasic delimitation of a filamentous  
467 marine genus, *Capillus* gen. nov. (Cyanobacteria, Oscillatoriaceae) with the description  
468 of two Brazilian species. *Algae* 33(4), 291-304.  
469 <https://doi.org/10.4490/algae.2018.33.11.25>

470

Hentschke et al. 2021

- 471 Caires, T. A., Lyra, G. M., Hentschke, G. S., Pedrini, A. G., Sant'Anna, C. L., Nunes, J.  
472 M. C., 2018b. *Neolyngbya* gen. nov. (Cyanobacteria, Oscillatoriaceae): A new  
473 filamentous benthic marine taxon widely distributed along the Brazilian coast. Mol.  
474 Phyl. Evol. 120, 196–211. <https://doi.org/10.1016/j.ympev.2017.12.009>  
475
- 476 Calteau, A., Fewer, D. P., Latifi, A., Coursin, T., Laurent, T., Jokela, J., Kerfeld, C. A.,  
477 Sivonen, K., Piel, J., Gugger, M., 2014. Phylum-wide comparative genomics unravel  
478 the diversity of secondary metabolism in Cyanobacteria. BMC Genomics, 15(1), 977.  
479 <https://doi.org/10.1186/1471-2164-15-977>  
480
- 481 Coelho, C., Silva, R., Veloso-Gomes, F., Taveira-Pinto, F., 2009. Potential effects of  
482 climate change on northwest Portuguese coastal zones. ICES Journal of Marine Science  
483 667, 1497-1507.
- 484 Engene, N., Tronholm, A., Paul, V. J., 2018. Uncovering cryptic diversity of *Lyngbya*:  
485 the new tropical marine cyanobacterial genus *Dapis* (Oscillatoriales). J. Phycol. 54(4),  
486 435-446. <https://doi.org/10.1111/jpy.12752>.  
487
- 488 Hamilton, T. L., Bryant, D. A., Macalady, J. L., 2016. The role of biology in planetary  
489 evolution: cyanobacterial primary production in low-oxygen Proterozoic oceans.  
490 Environ. Microbiol., 18(2), 325–340. <https://doi.org/10.1111/1462-2920.13118>.  
491
- 492 Hentschke, G. S., Johansen, J. R., Pietrasiak, N., Fiore, M. F., Rigonato, J., Sant'Anna,  
493 C. L., Komárek, J., 2016. Phylogenetic placement of *Dapisostemon* gen. nov. and  
494 *Streptostemon*, two tropical heterocytous genera (Cyanobacteria). Phytotaxa 245 (2),  
495 129–143. <https://doi.org/10.11646/phytotaxa.245.2.4>.

*Hentschke et al. 2021*

496

497 Ishida, T., Watanabe, M.M., Sugiyama, J. & Yokota A., 2001. Evidence for  
498 polyphyletic origin of the members of the orders of Oscillatoriales and Pleurocapsales  
499 as determined by 16S rDNA analysis. FEMS Microbiol. Lett. 201(1), 79-82.  
500 <https://doi.org/10.1111/j.1574-6968.2001.tb10736.x>.

501

502 Jahodářová, E., Dvořák, P., Hašler, P., Holušová, K., Pouličková, A., 2017. *Elainella*  
503 gen. nov.: a new tropical cyanobacterium characterized using a complex genomic  
504 approach. Eur. J. Phycol. 53(1), 39-51. <https://doi.org/10.1080/09670262.2017.1362591>

505

506

507 Johansen, J. R., Casamatta, D. A., 2005. Recognizing cyanobacterial diversity through  
508 adoption of a new species paradigm. Algal. Stud. 117, 71-93.  
509 <https://doi.org/10.1127/1864-1318/2005/01117-0071>

510

511 Komárek, J., Anagnostidis, K., 2005. Cyanoprokaryota 2. Teil Oscillatoriales, in: Büdel,  
512 B., Krienitz, L., Gärtner, G., Schagerl, M. (Eds.), Süßwasserflora von Mitteleuropa,  
513 vol. 19/2. Elsevier Spektrum Akademische, München, pp 1-759.

514

515 Komárek, J., Zapomělová, E., Šmarda, J., Kopecký, J., Rejmánková, E., Woodhouse, J.,  
516 Neilan, B. N., Komárková, J., 2013. Polyphasic evaluation of *Limnoraphis robusta*, a  
517 water-bloom forming cyanobacterium from Lake Atitlán, Guatemala, with a description  
518 of *Limnoraphis* gen. nov.. Fottea 13(1), 39–52. <https://doi.org/10.5507/fot.2013.004>

519



*Hentschke et al. 2021*

- 520 Komárek, J., Kastovsky, J., Mares, J., Johansen, J. R., 2014. Taxonomic classification  
521 of cyanoprokaryotes (cyanobacterial genera), using a polyphasic approach, *Preslia* 86,  
522 295–335. <https://doi.org/10.1080/09670262.2016.1163738>  
523
- 524 Konstantinou, D., Voultsiadou, E., Panteris, E., Zervou, S., Gkelis A. H. S., 2019.  
525 *Leptothoe*, a new genus of marine cyanobacteria (Synechococcales) and three new  
526 species associated with sponges from the Aegean Sea. *J. Phycol.* 55(4), 882-897.  
527 <https://doi.org/10.1111/jpy.12866>.  
528
- 529 Kotai, J., 1972. Instructions for Preparation of Modified Nutrient Solution Z8 for  
530 Algae Publication B-11/69. Norwegian Institute for Water Research, Oslo.  
531
- 532 Lane, D. J., 1999. 16S/23S rRNA sequencing, in: Stackebrandt, E., Goodfellow M.  
533 (Eds.), *Nucleic Acid Techniques in Bacterial Systematics*. Wiley, Chichester, pp. 115–  
534 175.  
535
- 536 Mai, T., Johansen, J. R., Pietrasiak, N., Bohunická, M., Martin, M. P., 2018. Revision of  
537 the Synechococcales (Cyanobacteria) through recognition of four families including  
538 Oculatellaceae fam. nov. and Trichocoleaceae fam. nov. and six new genera containing  
539 14 species. *Phytotaxa* 365(1), 1–59. <https://doi.org/10.11646/phytotaxa.365.1.1>.  
540
- 541 Miller, M., Schwartz, T., Pickett, B., He, S., Klem, E., Passarotti, R. H., M., Kaufman,  
542 S., O'Leary, M. A., 2015. A RESTful API for Access to Phylogenetic Tools via the  
543 CIPRES Science Gateway. *Evol. Bioinform.* 11, 43–8.  
544 <https://doi.org/10.4137/EBO.S21501>

Hentschke et al. 2021

545

546 Mühlsteinová, R., Hauer, T., De Ley, P., Pietrasiak, N., 2018. Seeking the true  
547 *Oscillatoria*: A quest for a reliable phylogenetic and taxonomic reference point. *Preslia*  
548 90, 151–169. <https://doi.org/10.23855/preslia.2018.151>.

549

550 Neilan, B. A., Jacobs, D., Dot, T. D., Blackall, L. L., Hawkins, P. R., Cox P. T.,  
551 Goodman, A. E., 1997. rRNA sequences and evolutionary relationships among toxic  
552 and nontoxic cyanobacteria of the genus *Microcystis*. *Int. Jour. Syst. Bact.* 47, 693–697.  
553 <https://doi.org/10.1099/00207713-47-3-693>

554

555 Nowicka-Krawczyk, P., Mühlsteinová, R., Hauer, T., 2019. Detailed characterization of  
556 the *Arthrospira* type species separating commercially grown taxa into the new genus  
557 *Limnospira* (Cyanobacteria). *Nat. Scient. Rep.* 9, 694. [https://doi.org/10.1038/s41598-](https://doi.org/10.1038/s41598-018-36831-0)  
558 018-36831-0.

559

560 Nubel, U., Garcia-Pichel, F., Muyzer, G., 1997. PCR primers to amplify 16S rRNA  
561 genes from cyanobacteria. *Appl. Environ. Microbiol.* 63, 3327–3332.

562

563 Ramos et al., 2017. Cyanobacterial diversity held in microbial biological resource  
564 centers as a biotechnological asset: the case study of the newly established LEGE  
565 culture collection. *Journal of Applied Phycology* 30, 1437–1451.

566

567 Ronquist, F., Teslenko, M., Van der Mark, P., Ayres, D. L., Darling, A., Höhna, S.,  
568 Larget, B., Liu, L., Suchard, M. A., Huelsenbeck, J. P., 2012. MrBayes 3.2: Efficient

*Hentschke et al. 2021*

569 bayesian phylogenetic inference and model choice across a large model space. *Syst.*  
570 *Biol.* 61, 539–542. <https://doi.org/10.1093/sysbio/sys029>.  
571  
572 Sambrook, J., Russell, D.W., 2001. *Molecular Cloning, volume 1: a laboratory manual*.  
573 CSHL Press, New York.  
574  
575 Sharp, K., Arthur, K. E., Gu, L., Ross, C., Harrison, G., Gunasekera, S. P., Meickle, T.,  
576 Matthew, S., Luesch, H., Thacker, R. W., Sherman, D. H., Paul, V. J., 2009.  
577 Phylogenetic and chemical diversity of three chemotypes of bloom-forming *Lyngbya*  
578 species (Cyanobacteria: Oscillatoriales) from reefs of southeastern Florida. *Appl.*  
579 *Environ. Microbiol.* 75(9), 2879-2888. <https://doi.org/10.1128/AEM.02656-08>  
580  
581 Stamatakis, A., 2014. RAxML version 8: a tool for phylogenetic analysis and post-  
582 analysis of large phylogenies. *Bioinf.* 30, 1312–1313.  
583 <https://doi.org/10.1093/bioinformatics/btu033>.  
584  
585 Tamura, K., Stecher, G., Peterson, D., Filipski, A., Kumar, S., 2013. MEGA6:  
586 molecular evolutionary genetics analysis version 6.0. *Mol. Biol. Evol.* 30, 2725–2729.  
587 <https://doi.org/10.1093/molbev/mst197>.  
588  
589 Taton, A., Grubisic, S., Brambilla, E., De Wit, R., Wilmotte, A., 2003. Cyanobacterial  
590 diversity in natural and artificial microbial mats of Lake Fryxell (McMurdo Dry  
591 Valleys, Antarctica): a morphological and molecular approach. *Appl. Environ.*  
592 *Microbiol.* 69(9), 5157-5169. <https://doi.org/10.1128/aem.69.9.5157-5169>.  
593

Hentschke et al. 2021

- 594 Thompson, J. D., Higgins, D. G., Gibson, T. J., 1994. CLUSTAL W: improving the  
595 sensitivity of progressive multiple sequence alignment through sequence weighting,  
596 position-specific gap penalties and weight matrix choice. Nucl. Acids Res. 22(22),  
597 4673-4680. <https://doi.org/10.1093/nar/22.22.4673>.
- 598
- 599 Witt, M. J., Sheehan, E. V., Bearhop, S., Broderick, A. C., Conley, D. C., Cotterell, S.  
600 P., Godley, B. J., 2012. Assessing wave energy effects on biodiversity: the Wave Hub  
601 experience. Philosophical Transactions of the Royal Society A: Mathematical, Physical  
602 and Engineering Sciences 370, 502-529.
- 603
- 604 Wright, E. S., Yilmaz, L. S., Noguera, D. R., 2012. DECIPHER, A Search-Based  
605 Approach to Chimera Identification for 16S rRNA Sequences. Appl. Environ.  
606 Microbiol. 78(3), 717-725. <https://doi.org/10.1128/AEM.06516-11>.
- 607
- 608 Zhou, W. G., Ding, D. W., Yang, Q. S., Ahmad, M., Zhang, Y. Z., Lin, X. C., Zhang, Y.  
609 Y., Ling, J., Dong, J. D., 2018. *Marileptolyngbya sina* gen. nov., sp. nov. and  
610 *Salileptolyngbya diazotrophicum* gen. nov., sp. nov. (Synechococcales, Cyanobacteria),  
611 species of cyanobacteria isolated from a marine ecosystem. Phytotaxa 383, 075–092.  
612 <https://doi.org/10.11646/phytotaxa.383.1.4>.
- 613
- 614 Zuker, M., 2003. Mfold web server for nucleic acid folding and hybridization  
615 prediction. Nucl. Acids Res. 31, 3406-3415. <https://doi.org/10.1093/nar/gkg595>.
- 616
- 617
